# Supplementary material
Source: PubMed Central journal article supplement (PMC7857422)
Supplement: EMBR-22-e50785-s001.pdf [file EMBR-22-e50785-s001.pdf]

## Appendix

### Altered hematopoietic system and self-tolerance in Bardet-Biedl Syndrome

**Authors:** Oksana Tsyklauri, Veronika Niederlova, Elizabeth Forsythe, Avishek Prasai, Ales Drobek, Petr Kasperek, Kathryn Sparks, Zdenek Trachtulec, Jan Prochazka, Radislav Sedlacek, Philip Beales, Martina Huranova, Ondrej Stepanek

#### Contents

|                         |   |
|-------------------------|---|
| Appendix Table S1 ..... | 1 |
| Appendix Table S2 ..... | 2 |
| Appendix Table S3 ..... | 3 |
| Appendix Table S4 ..... | 4 |
| Appendix Table S5 ..... | 5 |
| Appendix Table S6 ..... | 7 |

## Appendix Table S1

Counts of BBS patients from the CRIBBS registry presenting with more than one autoimmune condition.

|                                 | Count of all cases | Rheumatoid arthritis | Celiac disease | Ulcerative Colitis | Type I Diabetes Mellitus | Hashimoto's thyroiditis |
|---------------------------------|--------------------|----------------------|----------------|--------------------|--------------------------|-------------------------|
| <b>Rheumatoid arthritis</b>     | 17                 | x                    | 0              | 1                  | 0                        | 1                       |
| <b>Celiac disease</b>           | 2                  |                      | x              | 0                  | 0                        | 0                       |
| <b>Ulcerative Colitis</b>       | 2                  |                      |                | x                  | 0                        | 1                       |
| <b>Type I Diabetes Mellitus</b> | 6                  |                      |                |                    | x                        | 1                       |
| <b>Hashimoto's thyroiditis</b>  | 6                  |                      |                |                    |                          | x                       |

## Appendix Table S2

Counts of BBS patients from the Great Ormond Street Hospital & Guy's Hospital cohort presenting with more than one autoimmune condition.

|                                        | Count of all cases | Inflammatory Bowel Diseases | Type I Diabetes Mellitus | Celiac disease | Psoriasis | Sarcoidosis | Henoch-Schönlein purpura | Immune thrombocytopenic purpura | Vitiligo | Hypothyroidism |
|----------------------------------------|--------------------|-----------------------------|--------------------------|----------------|-----------|-------------|--------------------------|---------------------------------|----------|----------------|
| <b>Inflammatory Bowel Diseases</b>     | 3                  | x                           | 0                        | 0              | 0         | 0           | 0                        | 0                               | 0        | 0              |
| <b>Type I Diabetes Mellitus</b>        | 3                  |                             | x                        | 0              | 0         | 0           | 0                        | 0                               | 0        | 2              |
| <b>Celiac disease</b>                  | 4                  |                             |                          | x              | 0         | 0           | 0                        | 0                               | 0        | 1              |
| <b>Psoriasis</b>                       | 2                  |                             |                          |                | x         | 0           | 0                        | 0                               | 0        | 0              |
| <b>Sarcoidosis</b>                     | 1                  |                             |                          |                |           | x           | 0                        | 0                               | 0        | 0              |
| <b>Henoch-Schönlein purpura</b>        | 1                  |                             |                          |                |           |             | x                        | 0                               | 0        | 0              |
| <b>Immune thrombocytopenic purpura</b> | 1                  |                             |                          |                |           |             |                          | x                               | 0        | 1              |
| <b>Vitiligo</b>                        | 1                  |                             |                          |                |           |             |                          |                                 | x        | 1              |
| <b>Hypothyroidism</b>                  | 22                 |                             |                          |                |           |             |                          |                                 |          | x              |

### Appendix Table S3

Counts of BBS patients from the Great Ormond Street Hospital & Guy's Hospital cohort with/without an autoimmune disease and grouped by BBS genes with causative mutation.

| Gene with causative mutation | Autoimmune disease |           |               |
|------------------------------|--------------------|-----------|---------------|
|                              | NO                 | YES       | %             |
| BBS1                         | 67                 | 13        | 16,25%        |
| BBS2                         | 18                 | 1         | 5,26%         |
| BBS3                         | 1                  | 0         | 0,00%         |
| BBS4                         | 2                  | 2         | 50,00%        |
| BBS6                         | 2                  | 1         | 33,33%        |
| BBS7                         | 4                  | 1         | 20,00%        |
| BBS9                         | 6                  | 2         | 25,00%        |
| BBS10                        | 26                 | 8         | 23,53%        |
| BBS12                        | 12                 | 0         | 0,00%         |
| BBS14                        | 1                  | 0         | 0,00%         |
| Unknown                      | 26                 | 5         | 16,13%        |
| <b>Total</b>                 | <b>165</b>         | <b>33</b> | <b>16,67%</b> |

p = 0.28  
(two-sided  
Fisher's  
exact test)

#### Appendix Table S4

Counts of BBS patients from the Great Ormond Street Hospital & Guy's Hospital cohort with/without an autoimmune disease and grouped by functional groups of BBS genes with causative mutation.

| Causative mutation (group of genes)       | Autoimmune disease |     |        |
|-------------------------------------------|--------------------|-----|--------|
|                                           | NO                 | YES | %      |
| BBS1, 2, 4, 5, 7, 9 (the BBSome)          | 100                | 19  | 15,97% |
| BBS6, 10, 12 (Chaperonins for the BBSome) | 41                 | 10  | 19,61% |
| Other/Unknown                             | 24                 | 4   | 14,29% |

} p = 0.83  
(two-sided  
Fisher's  
exact test)

**Appendix Table S5**

5'-3' DNA sequences of the primers used in the study.

| Primer name    | 5'-3' DNA sequence      | Purpose       |
|----------------|-------------------------|---------------|
| F-GAPDH        | TGCACCACCAACTGCTTAGC    | qPCR          |
| R-GAPDH        | GGCATGGACTGTGGTCATGAG   |               |
| F-Tubb2A       | AACCAGATCGGCGCTAAGT     |               |
| R-Tubb2A       | TGCCAGCAGCTTCATTGTA     |               |
| F-eEF1a1       | ACACGTAGATTCCGGCAAGT    |               |
| R-eEF1a1       | AGGAGCCCTTTCCCATCTC     |               |
| F-BBS1         | ATCGGATTCTGACAGCGGG     |               |
| R-BBS1         | CCACCAGCTTGTACTCCCCA    |               |
| F-BBS2         | TGCCCCGATTCACCATGTAT    |               |
| R-BBS2         | CACGTGACCATCCTCTGTGTG   |               |
| F-BBS4         | AGCTTGGGATGAAAACCTCAGGT |               |
| R-BBS4         | GCTGTTCTTTGATCACAGCCTT  |               |
| F-BBS5         | GCGACCAGGGGAATTTAGGA    |               |
| R-BBS5         | ATGACAAGCGCCAAACCAAA    |               |
| F-BBS7         | AGGGCTACACAAAAGGTGGT    |               |
| R-BBS7         | TTCTCCTGAGGCGTGTGAC     |               |
| F-BBS8         | CTTATGATCAGGCGGCTTGGA   |               |
| R-BBS8         | GTGGGACCTGAGCAATAGCA    |               |
| F-BBS9         | ACTCCAGACCGACAGGTATT    |               |
| R-BBS9         | GGCTGACCAGGTAGGCAAAT    |               |
| F-BBS18        | AGCCCCTGATCGCTTACCTA    |               |
| R-BBS18        | GACAATGTCTCACTCGTCAGC   |               |
| F-CXCL12       | AAAGCTTTAAACAAGGGGCG    |               |
| R-CXCL12       | GCAGGAAGCGGGGAACTA      |               |
| F-IL7          | AAAGCCAGAGCGCCTGGGTG    |               |
| R-IL-7         | CTGGGCAGGGCAGTTCAGGC    |               |
| F-BBS4 Exon5/6 | GTGGCCAGATCTTTGTTTCTTCT | End-point PCR |
| F-BBS4 Exon 5  | GACATGTGCTGTTCTCAGCC    |               |
| R-BBS4 Exon 6  | GGCAGCTTTGTGTTTTCCCA    |               |
| F-BBS4 Exon 6  | GGGAAAACACAAAGCTGCCA    |               |
| R-BBS4 Exon 7  | GTGTAGCACACTCCAGGTT     |               |
| F-BBS4 Exon 7  | CCATAACCTGGGAGTGTGCT    |               |

|                |                                             |                             |
|----------------|---------------------------------------------|-----------------------------|
| R-BBS4 Exon 8  | CCAGGTCTCCCTGCAGTAAA                        |                             |
| F-BBS4 Exon 8  | GGGAGACCTGGATAAAGCCATC                      |                             |
| R-BBS4 Exon 10 | AGGTCAGTGCATTCCCAAGAT                       |                             |
| F-BBS4 Exon 10 | TGGGAATGCACTGACCTACG                        |                             |
| R-BBS4 Exon 11 | GTCCCCATGAGTCTGCATCA                        |                             |
| F-EcoRI-BBS4   | TCGGAATTCATGGCTGAAGTGAAGCTTGGGAT            | BBS4-<br>FLAG<br>cloning    |
| R-BBS4-Flag    | GTCTTTGTAGTCTTTTTCTTTCTTTTGTTCTGATGCTTC     |                             |
| R-ClaI-Flag    | TTTATCGATCTACTTGTCGTCATCGTCTTTGTAGTCTTTTTTC |                             |
| F-BBS18        | CGGTTACCTCCGTTTCTCTG                        | BBS18<br>mice<br>genotyping |
| R-BBS18        | TGAAGGTGTTTGGTGACTGC                        |                             |

### Appendix Table S6

Genetic modifications in ST2 cell clones obtained by CRISPR/Cas9 targeting of BBS4. Table comprises the modifications in *Bbs4* and the derived protein sequences. #1 – sgRNA #1, #2 – sgRNA #2, bold - amino acid sequence different from WT, \* - stop codon.

| ST2 clones | BBS4 ORF nucleotide modification 5' to 3' | protein sequence from the START to STOP codon                                                                    |
|------------|-------------------------------------------|------------------------------------------------------------------------------------------------------------------|
| B4         | #1: deletion of T(131)                    | MAEVKLG MKTQVPASVESQKPRS KKAPDFPIVEKQNWLIH<br><b>LHYTGRIMKLARL*</b>                                              |
| B7         | #2: deletion of C(235)                    | MAEVKLG MKTQVPASVESQKPRS KKAPDFPIVEKQNWLIH<br>LHYIRKDYEACKAVIKEQLQETQGLCEYAIYVQALIFR <b>WK</b><br><b>EISKNP*</b> |
| D7-2       | #1: deletion of AT(130-131)               | MAEVKLG MKTQVPASVESQKPRS KKAPDFPIVEKQNWLIH<br><b>LHYPEGL*</b>                                                    |
| F7         | #1: deletion of TA(129-130)               | MAEVKLG MKTQVPASVESQKPRS KKAPDFPIVEKQNWLIH<br><b>LHYPEGL*</b>                                                    |
| F8         | none                                      | WT sequence                                                                                                      |
