# Supplementary material
Source: PubMed Central journal article supplement (PMC7857422)
Supplement: EMBR-22-e50785-s002.pdf [file EMBR-22-e50785-s002.pdf]

## Expanded View Figures

### Figure EV1. Analysis of the hypomorphic nature of the *Bbs4*<sup>GT</sup> allele.

- A The exon inclusion in *Bbs4* transcript in the brain of *Bbs4*<sup>+/+</sup> (WT), *Bbs4*<sup>GT/GT</sup>, and *Bbs4*<sup>KO/KO</sup> mice was analyzed by end-point RT-PCR with primers specific to exons 5, 6, 7, 8, or 10 (forward) and exon 11 (reverse). A single mouse of each genotype was analyzed.
- B The relative expression of *Bbs4* exon 5–6, exon 6–7, exon 7–8, exon 8–10, exon 10–11 in the brain and kidney of *Bbs4*<sup>+/+</sup> ( $n = 2$  mice), *Bbs4*<sup>GT/GT</sup> ( $n = 1$ ), and *Bbs4*<sup>KO/KO</sup> ( $n = 1$ ) mice was analyzed using RT-qPCR. Melting curve analysis for the amplicon representing exon 5–6 is shown for *Bbs4*<sup>+/+</sup> and *Bbs4*<sup>GT/GT</sup> mice. The average from two animals is shown for *Bbs4*<sup>+/+</sup>.
- C Results of Sanger sequencing of the amplicon representing *Bbs4* exon 5–6 of the *Bbs4*<sup>GT/GT</sup> mice. The sequence shown in red originates from the *Bbs4* GT cassette (En2 exon) and is absent in *Bbs4* WT RNA.
- D C-terminally FLAG-tagged full-length *Bbs4* WT and *Bbs4* GT cDNA was transiently expressed in HEK293T cells. The expression of BBS4 was detected by anti-FLAG antibody via immunoblotting. Re-probing the membrane for actin served as a loading control. The same actin staining (30 s exposure) is shown for both exposures of anti-FLAG staining. The arrow indicates a weak band with low apparent molecular weight which was present only in cells transfected with *Bbs4* GT cDNA. Representative experiment out of two biological replicates is shown.
- E The expression of properly spliced *Bbs4* (primers annealed to exon 5/6 boundary and exon 7) in the brains of *Bbs4*<sup>+/+</sup> and *Bbs4*<sup>GT/GT</sup> mice was analyzed by RT-qPCR. The melting curve analysis of the amplicon is shown. The experiment shows two technical replicates (the tissue was divided into halves before RNA isolation) using a single animal of each strain.

Source data are available online for this figure.

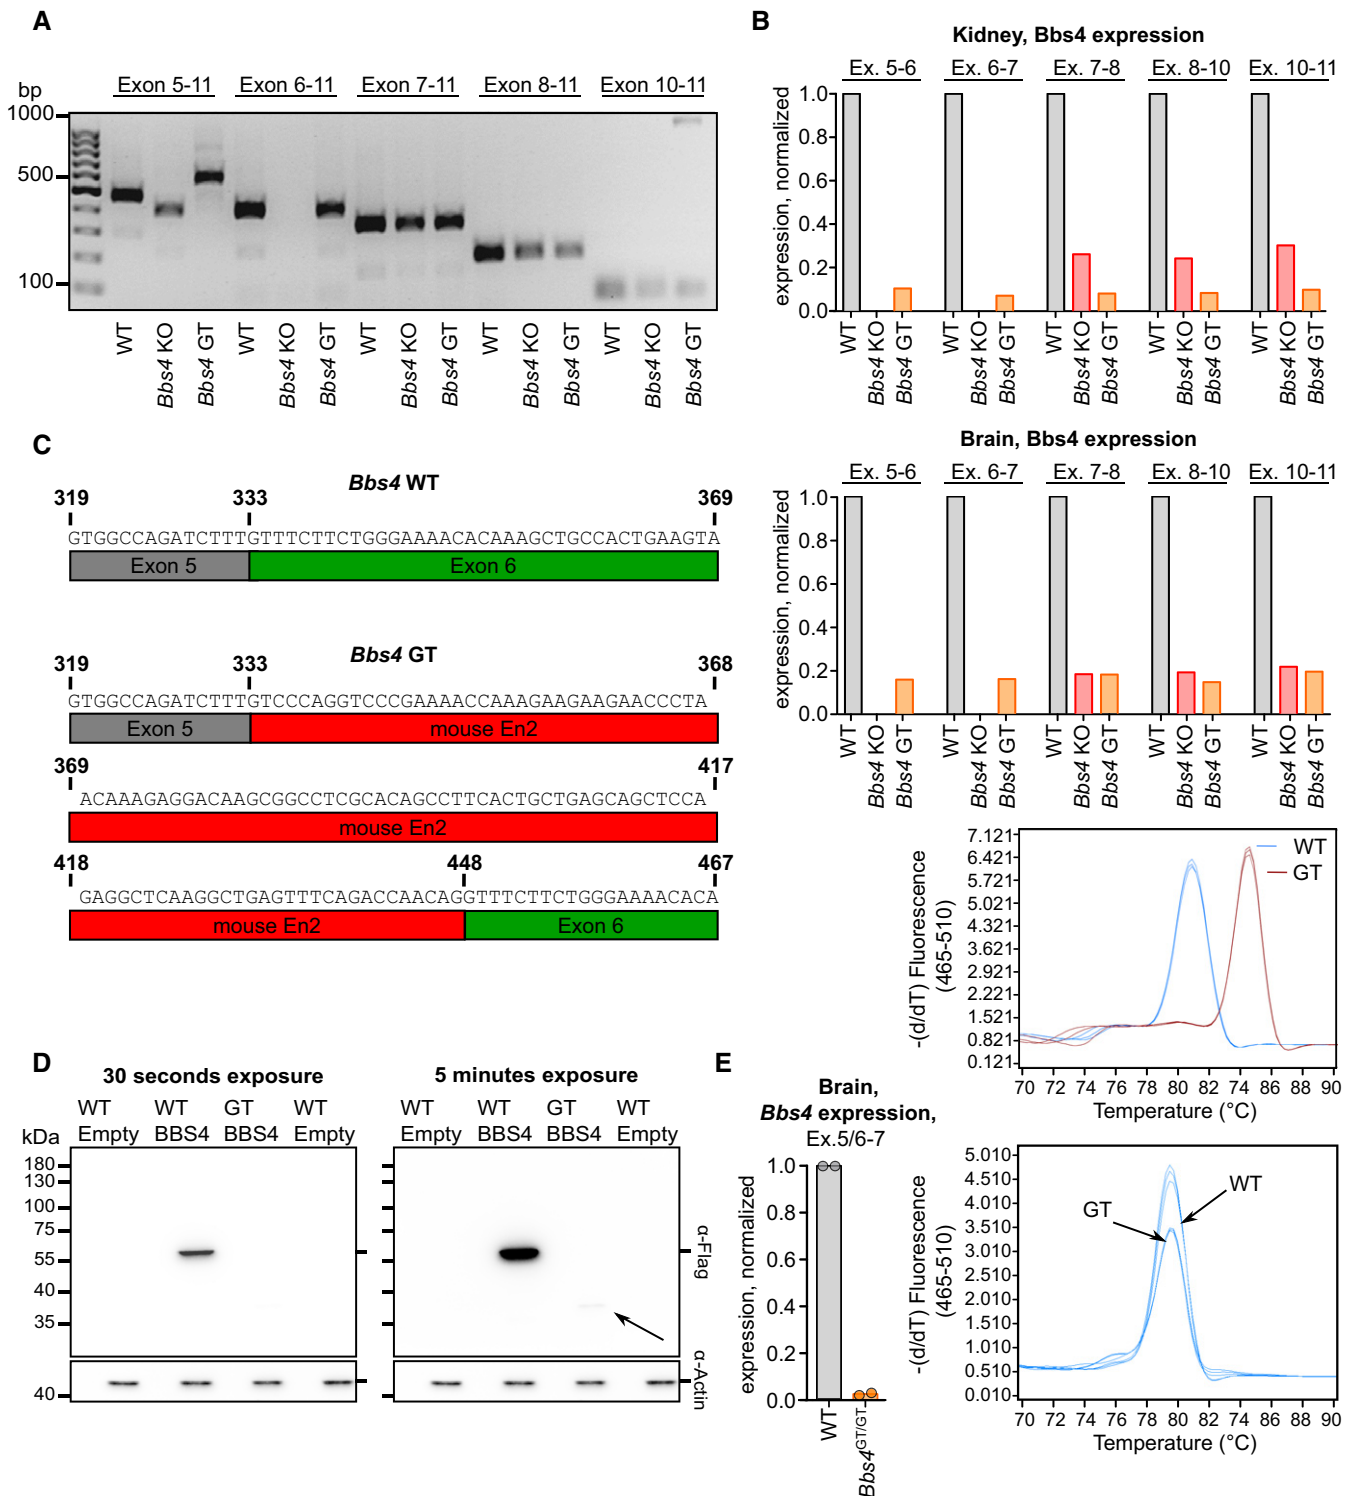

Figure EV1.

**Figure EV2. T-cell compartment is mildly affected in *Bbs4*<sup>KO/KO</sup> mice and unaffected in *Bbs4*<sup>GT/GT</sup>.**

- A, B Cells isolated from thymi of 6 weeks old *Bbs4*<sup>+/+</sup> (WT) ( $n = 5$  mice) and *Bbs4*<sup>GT/GT</sup> ( $n = 4$ ) littermates were analyzed by flow cytometry in three independent experiments. Representative staining is shown. (B) Thymic cell populations: double-positive (DP) (CD4<sup>+</sup> CD8<sup>+</sup>), CD4 single-positive (SP) (CD4<sup>+</sup>, CD8<sup>-</sup>), CD8 SP (CD4<sup>-</sup> CD8<sup>+</sup>), double-negative (DN) (CD4<sup>-</sup> CD8<sup>-</sup>) cells.
- C, D Cells isolated from lymph nodes (LN) and spleens (SPL) of *Bbs4*<sup>+/+</sup> ( $n = 9$  mice) and *Bbs4*<sup>GT/GT</sup> ( $n = 10$ ) littermates, or *Bbs4*<sup>+/+</sup> ( $n = 9$ ) and *Bbs4*<sup>KO/KO</sup> ( $n = 8$ ) littermates were analyzed by flow cytometry, and percentage of TCR $\beta$ <sup>+</sup>, or CD8<sup>+</sup>, CD4<sup>+</sup> cells was determined. Seven independent experiments for *Bbs4*<sup>GT/GT</sup>, six independent experiments for *Bbs4*<sup>KO/KO</sup>. Mean  $\pm$  SEM. Statistical significance was calculated using two-tailed Mann–Whitney test.
- E Representative experiment showing CD4<sup>+</sup> and CD8<sup>+</sup> T-cell populations in spleens of *Bbs4*<sup>GT/GT</sup>, *Bbs4*<sup>KO/KO</sup>, and their WT littermates.
- F Cells isolated from lymph nodes (LN) and spleens (SPL) of *Bbs4*<sup>+/+</sup> ( $n = 8$  mice) and *Bbs4*<sup>GT/GT</sup> ( $n = 9$ ) littermates, or *Bbs4*<sup>+/+</sup> ( $n = 9$ ) and *Bbs4*<sup>KO/KO</sup> ( $n = 8$ ) littermates were analyzed by flow cytometry, and percentage of CD8<sup>+</sup> CD44<sup>+</sup> cells was determined. Six independent experiments were performed for each strain. Representative staining of T cells from spleen is shown. Mean  $\pm$  SEM. Statistical significance was calculated using two-tailed Mann–Whitney test.

Source data are available online for this figure.

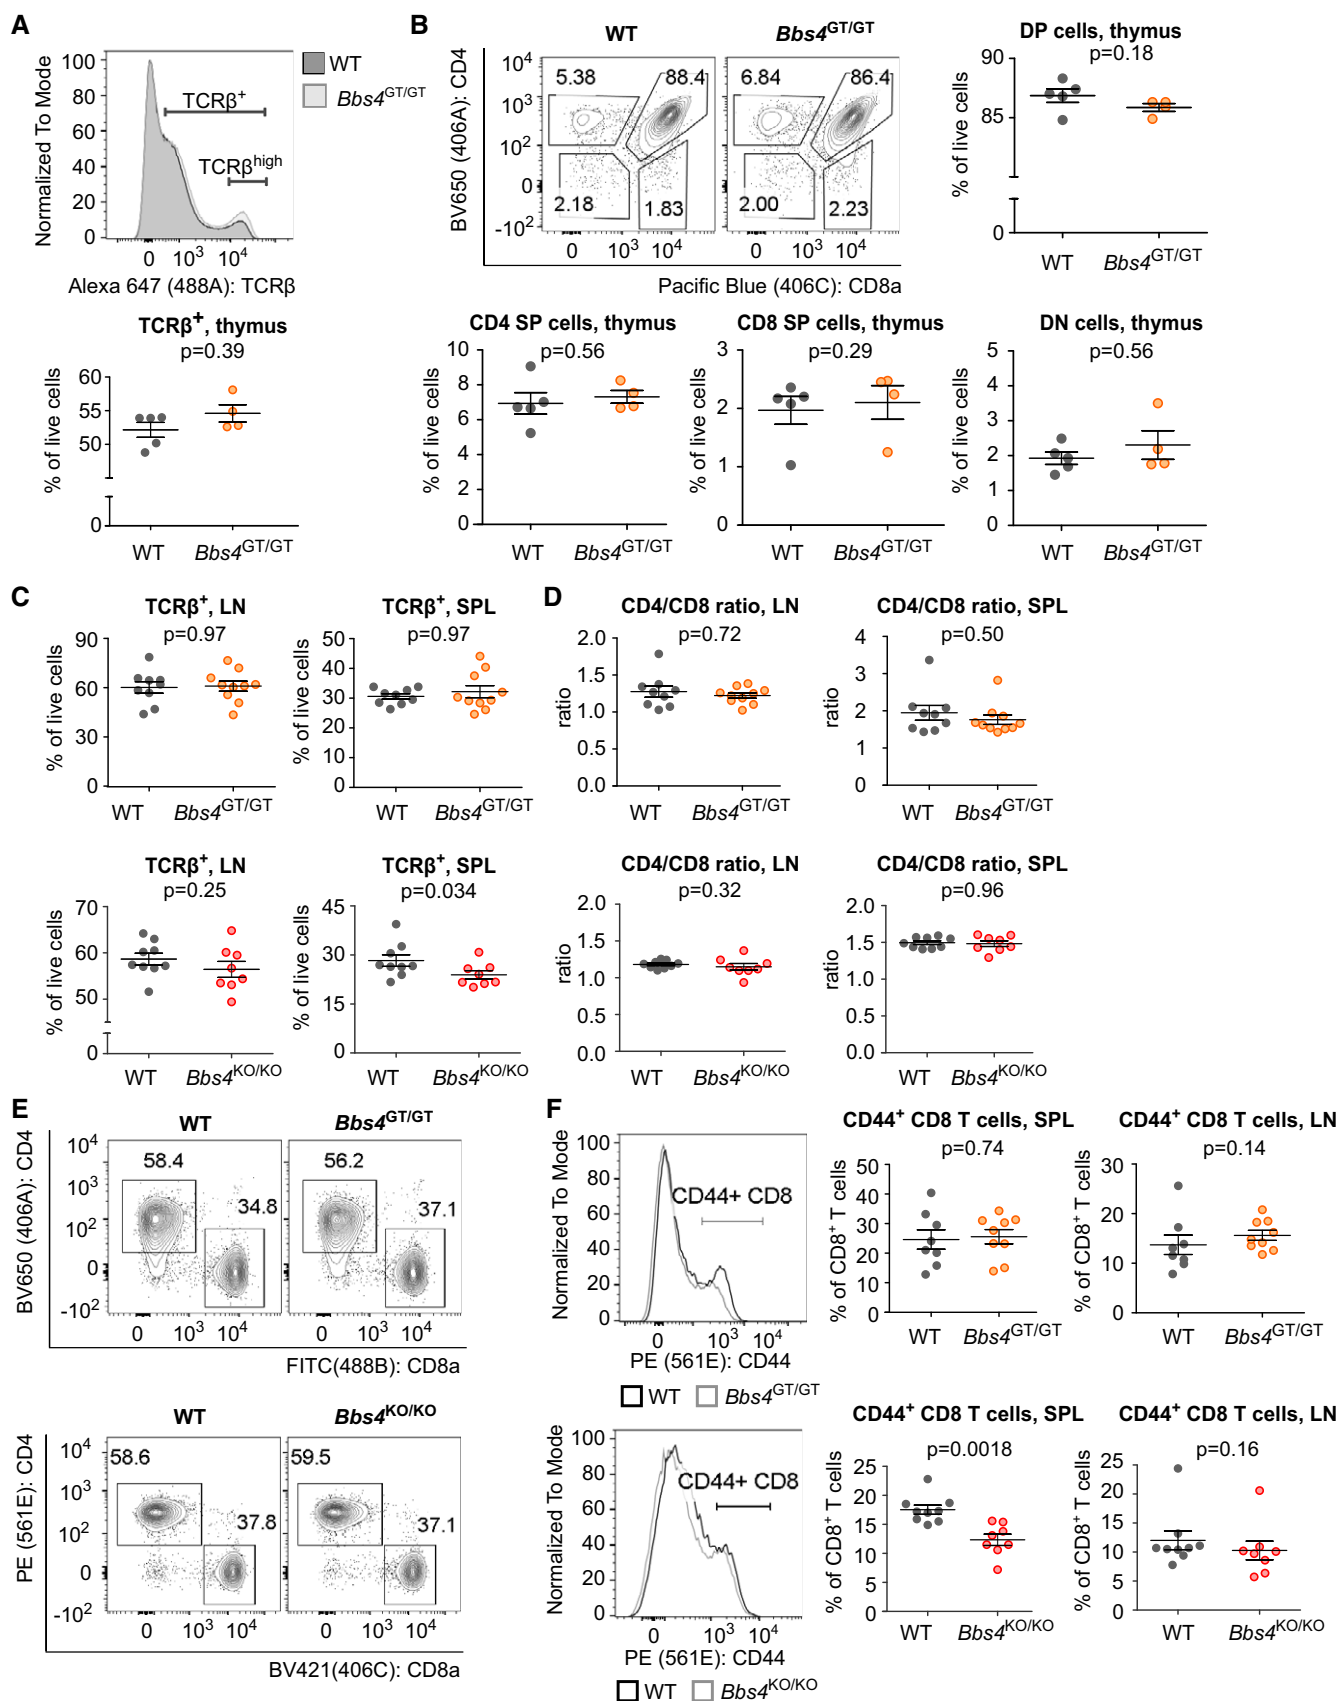

Figure EV2.

**Figure EV3. *Bbs4* deficiency in mice leads to B-cell compartment alterations.**

- A Percentage of B220<sup>+</sup> cells in the bone marrow (BM) of *Bbs4*<sup>GT/GT</sup> (*n* = 10 mice), *Bbs4*<sup>KO/KO</sup> (*n* = 10) and their *Bbs4*<sup>+/+</sup> (WT) littermates (*n* = 9, *n* = 11, respectively) was determined by flow cytometry. For *Bbs4* GT strain, a representative experiment out of six in total is shown. For *Bbs4* KO strain, a representative experiment out of eight in total is shown. Statistical significance was calculated using two-tailed Mann–Whitney test. Medians are shown.
- B Splenocyte count in *Bbs4*<sup>+/+</sup> (*n* = 9 mice) and *Bbs4*<sup>KO/KO</sup> (*n* = 7) mice. Medians are shown. Statistical significance was calculated using two-tailed Mann–Whitney test.
- C Percentage of B cells (CD19<sup>+</sup>) in the spleen (SPL) of *Bbs4*<sup>GT/GT</sup> (*n* = 8 mice), *Bbs4*<sup>KO/KO</sup> (*n* = 10) and their *Bbs4*<sup>+/+</sup> littermates (*n* = 9 and *n* = 11, respectively) was determined. Six independent experiments for *Bbs4*<sup>GT/GT</sup> and eight experiments for *Bbs4*<sup>KO/KO</sup> were performed. Statistical significance was calculated using two-tailed Mann–Whitney test. Medians are shown.
- D Percentage of splenic (SPL) late mature (IgM<sup>−</sup> IgD<sup>+</sup>) B cells (Late matB) among viable CD19<sup>+</sup> cells in *Bbs4*<sup>+/+</sup> (*n* = 9 mice) and *Bbs4*<sup>GT/GT</sup> (*n* = 8) mice. Representative experiment out of six in total is shown. Statistical significance was calculated using two-tailed Mann–Whitney test. Medians are shown.
- E Percentage of late mature (IgM<sup>−</sup> IgD<sup>+</sup>) B cells (Late matB) among viable CD19<sup>+</sup> cells in lymph nodes (LN) from *Bbs4*<sup>GT/GT</sup> (*n* = 8 mice) and *Bbs4*<sup>+/+</sup> littermates (*n* = 9), or *Bbs4*<sup>KO/KO</sup> (*n* = 10) mice and *Bbs4*<sup>+/+</sup> controls (*n* = 11). Representative experiments are shown. Statistical significance was calculated using two-tailed Mann–Whitney test. Medians are shown.
- F Schematic representation of the *Bbs18* KO mouse model. *Bbs18* reference sequence: ENSMUSG00000084957 (Ensembl database).
- G Genotypic ratio of *Bbs18*<sup>+/+</sup>, *Bbs18*<sup>+/<sup>KO</sup></sup>, or *Bbs18*<sup>KO/KO</sup> at weaning from mating of *Bbs18*<sup>+/<sup>KO</sup></sup> parents. Binomial test was used for statistical comparison of the observed distribution to the expected Mendelian ratio.
- H, I Comparison of *Bbs18*<sup>KO/KO</sup> mice (*n* = 2 mice) mice with pooled *Bbs18*<sup>+/+</sup> (*n* = 1, dark gray square) and *Bbs18*<sup>+/<sup>KO</sup></sup> (*n* = 3, light gray square) controls. All six mice were littermates and were analyzed side by side in a single experiment. (H) Percentage of B-cell precursors (IgM<sup>−</sup> IgD<sup>−</sup>) in the bone marrow (BM). Gated on viable B220<sup>+</sup> cells. Medians are shown. (I) Percentage of splenic MZ B cells (CD23<sup>−</sup> CD1d<sup>+</sup>) in *Bbs18*<sup>KO/KO</sup> mice and their control littermates was determined. Gated on viable CD19<sup>+</sup>, IgD<sup>−</sup> IgM<sup>+</sup>, CD138<sup>−</sup> cells. Medians are shown.

Source data are available online for this figure.

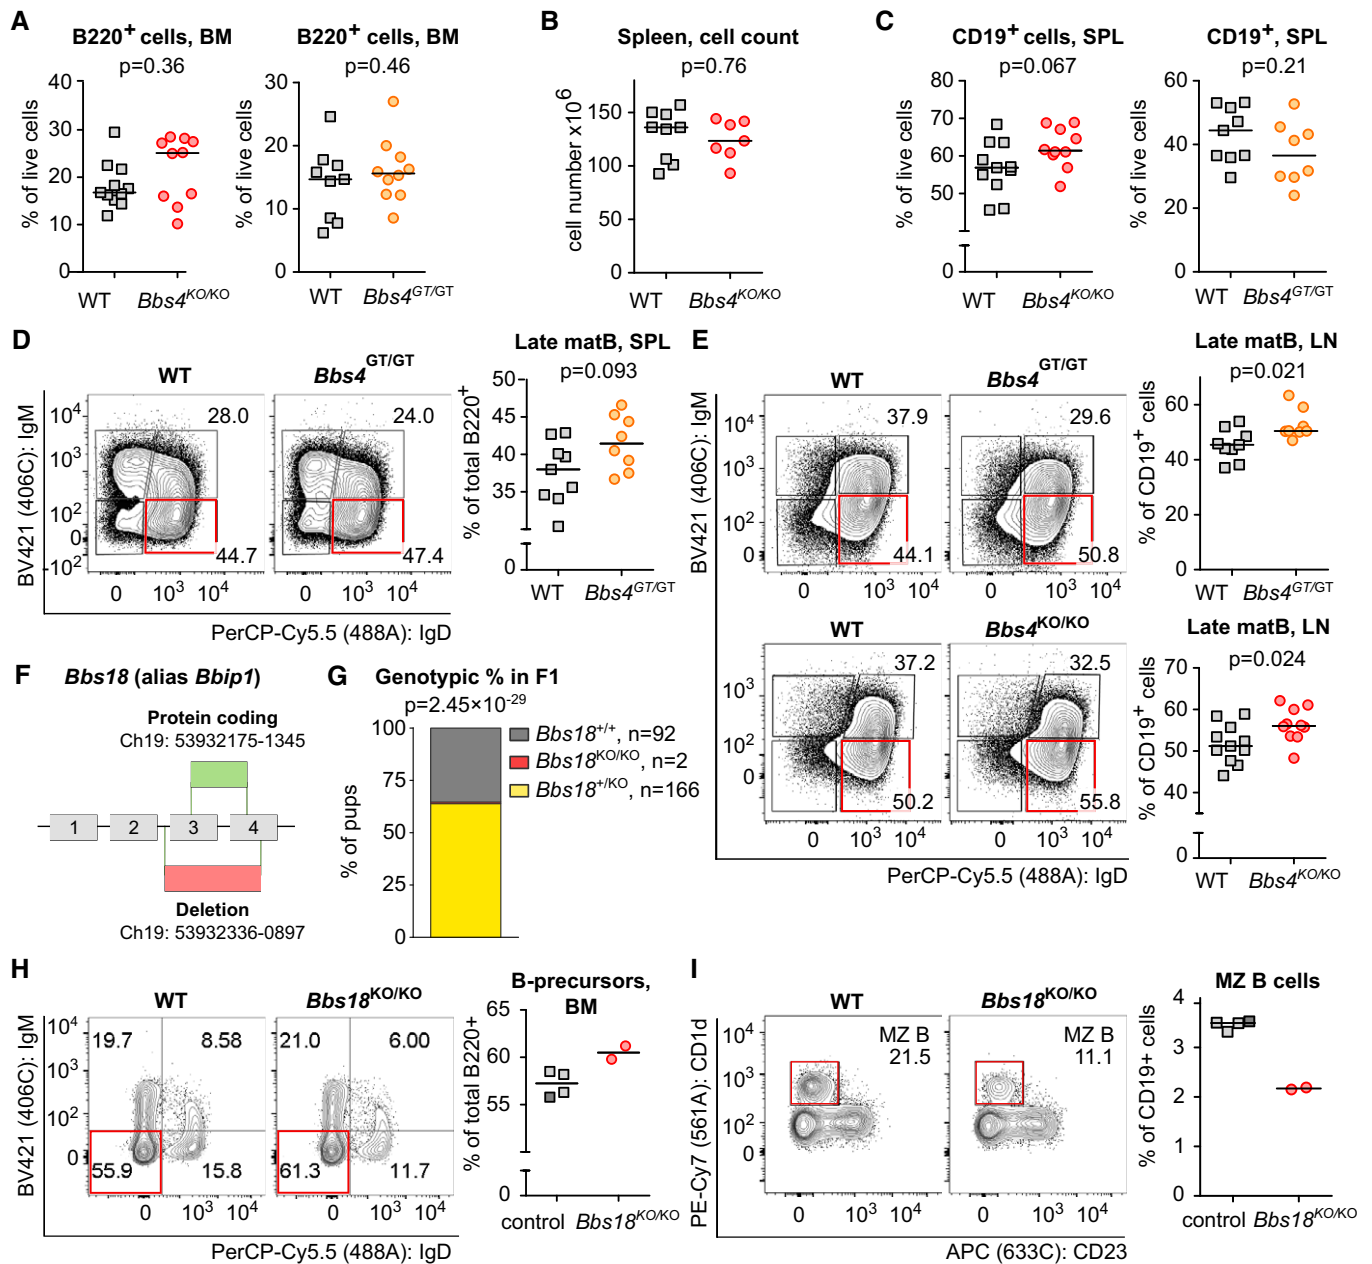

Figure EV3.

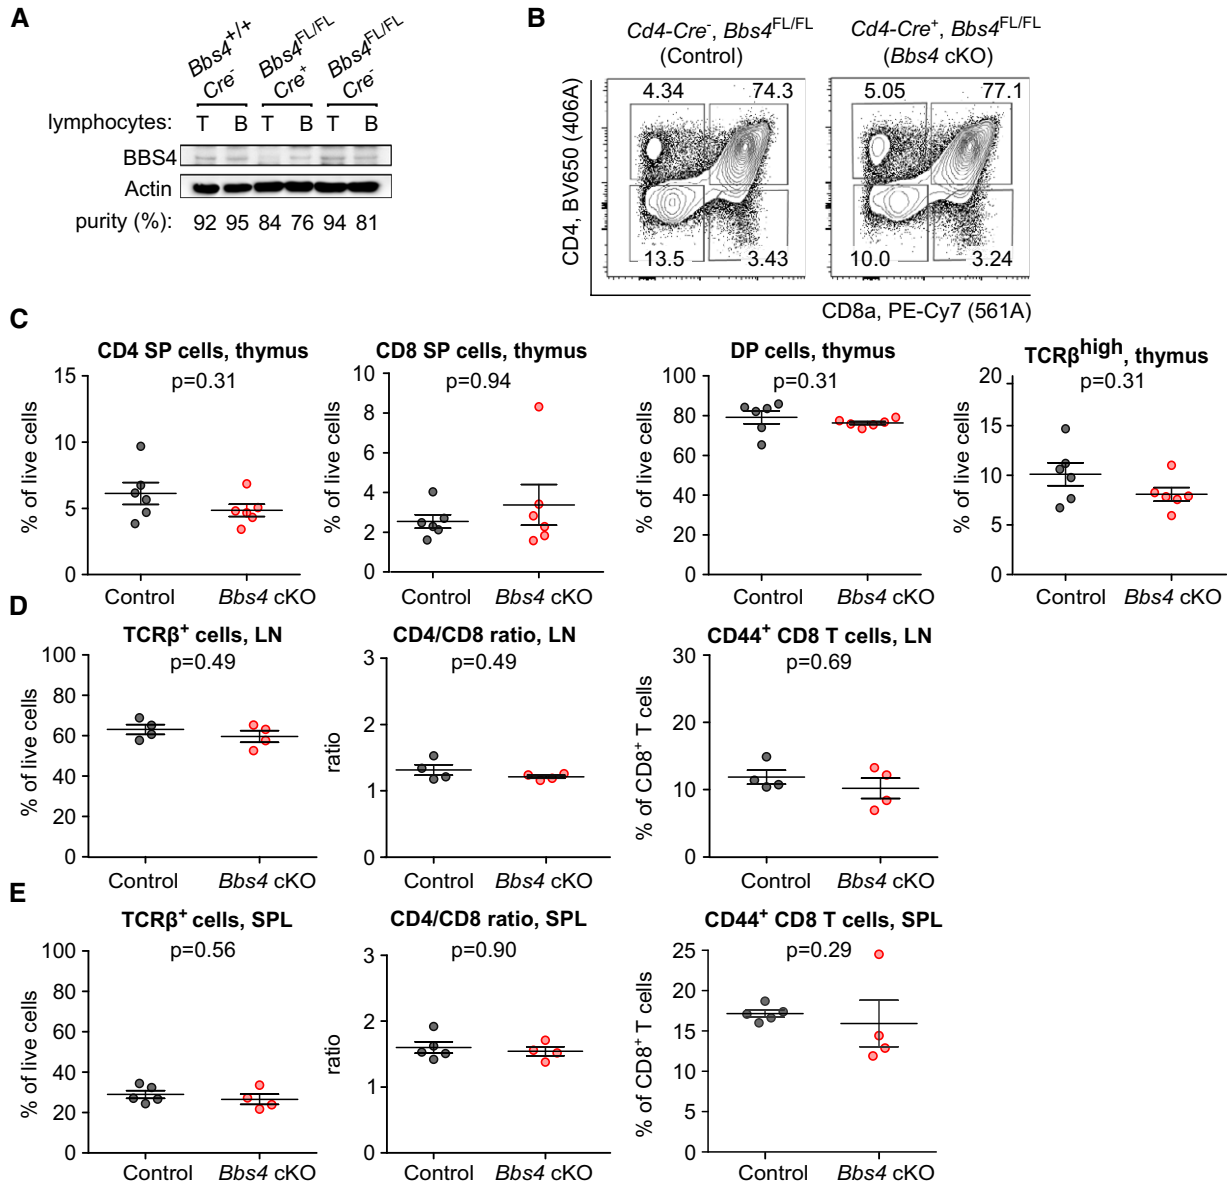

**Figure EV4. BBS4 has no intrinsic role in T-cell development.**

**A** The immunoblot analysis of the BBS4 expression in enriched T or B cells taken from lymph nodes and spleens of *Bbs4*<sup>+/+</sup> *Cd4*-Cre<sup>-</sup>, *Bbs4*<sup>FL/FL</sup> *Cd4*-Cre<sup>+</sup>, and *Bbs4*<sup>FL/FL</sup> *Cd4*-Cre<sup>-</sup> mice. The purity of the enriched populations is indicated. β-actin staining served as a loading control. Part of the identical immunoblot is shown in Fig 1B. A representative experiment out of three biological replicates in total is shown.

**B–E** Cells isolated from thymi (B, C), lymph nodes (LN) (D), and spleens (SPL) (E) of *Bbs4*<sup>FL/FL</sup> *Cd4*-Cre<sup>+</sup> (*Bbs4* cKO) mice were analyzed by flow cytometry. *Bbs4*<sup>+/+</sup> *Cd4*-Cre<sup>+</sup> and *Bbs4*<sup>FL/FL</sup> *Cd4*-Cre<sup>-</sup> mice were used as controls interchangeably. (B, C) Thymic cell populations: CD4 single-positive (SP) (CD4<sup>+</sup>, CD8<sup>-</sup>), CD8 SP (CD4<sup>-</sup> CD8<sup>+</sup>), double-positive (DP) (CD4<sup>+</sup> CD8<sup>+</sup>), TCRβ<sup>high</sup> cells. *n* = 6 mice per group, four independent experiments. Mean ± SEM, two-tailed Mann–Whitney test. (D) T-cell populations in lymph nodes, *n* = 4 mice per group, three independent experiments. Mean ± SEM, two-tailed Mann–Whitney test. (E) T-cell populations in spleens of control (*n* = 5 mice) and *Bbs4* cKO (*n* = 4), analyzed in three independent experiments. Mean ± SEM, two-tailed Mann–Whitney test.

Source data are available online for this figure.

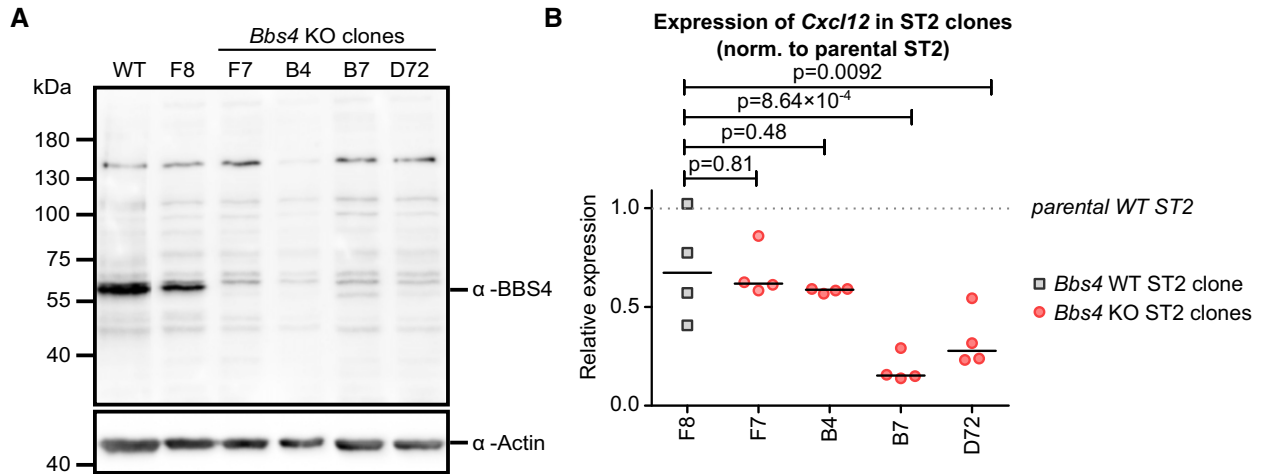

**Figure EV5. BBS4 regulates *Cxcl12* expression in ST2 cells.**

- A The expression of BBS4 in the parental ST2 line and in five *Bbs4* KO ST2 clones was analyzed by immunoblotting. The parental line and the clone F8 expresses BBS4, whereas the other clones lack BBS4. Re-probing the membrane for actin served as a loading control. These results are in agreement with the results of the sequencing of the *Bbs4* locus (Appendix Table S6). A representative experiment out of two biological replicates is shown.
- B The expression of *Cxcl12* in the parental ST2 line, in one *Bbs4* WT clone (F8) and in four *Bbs4* KO ST2 clones (indicated in red) was analyzed by RT-qPCR. The expression was normalized to *Gapdh* and to the parental ST2 line for each experiment (= 1, represented as a dotted line). The statistical significance was calculated with repeated measures ANOVA ( $P = 0.0007$ ) with Dunnett's multiple comparison post-test (indicated) for comparing each *Bbs4* KO clone to clone F8.  $n = 4$  biological replicates.

Source data are available online for this figure.
